# Supplementary material for: Brain Oxygen Optimization in Severe Traumatic Brain Injury (BOOST-3): a multicentre, randomised, blinded-endpoint, comparative effectiveness study of brain tissue oxygen and intracranial pressure monitoring versus intracranial pressure alone
Source: PubMed Central journal article supplement — BMJ Open. 2022 Mar 10;12(3):e060188. doi: 10.1136/bmjopen-2021-060188 (PMC8915289; doi:10.1136/bmjopen-2021-060188), 2022-03-10
Supplement: bmjopen-2021-060188.reviewer_comments.pdf [file bmjopen-2021-060188.reviewer_comments.pdf]

## PEER REVIEW HISTORY

BMJ Open publishes all reviews undertaken for accepted manuscripts. Reviewers are asked to complete a checklist review form (<http://bmjopen.bmj.com/site/about/resources/checklist.pdf>) and are provided with free text boxes to elaborate on their assessment. These free text comments are reproduced below.

## ARTICLE DETAILS

|                            |                                                                                                                                                                                                                                                    |
|----------------------------|----------------------------------------------------------------------------------------------------------------------------------------------------------------------------------------------------------------------------------------------------|
| <b>TITLE (PROVISIONAL)</b> | Brain Oxygen Optimization in Severe Traumatic Brain Injury (BOOST-3): A multicenter, randomized, blinded-endpoint, comparative effectiveness study of brain tissue oxygen and intracranial pressure monitoring versus intracranial pressure alone. |
| <b>AUTHORS</b>             | Bernard, Francis; Barsan, William; Diaz-Arrastia, Ramon; Merck, Lisa; Yeatts, Sharon; Shutter, Lori                                                                                                                                                |

This article was not externally reviewed at BMJ Open. Protocols that have been independently assessed prior to submission to BMJ Open are usually fast-tracked to publication on the grounds that further substantial changes will not be possible. This independent assessment will usually be external, independent review for both a substantial grant award from a non-commercial or government funder and ethics approval.
